# Supplementary material for: Reconciling the total carbon budget for boreal forest wildfire emissions using airborne observations
Source: Copernicus journal article supplement (doi:10.5194/acp-22-12493-2022), 2022-09-23
Supplement: Supplementary file [file acp-22-12493-2022-supplement-title-page.pdf › acp-22-12493-2022-supplement-title-page.pdf]

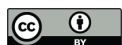

*Supplement of*

## **Reconciling the total carbon budget for boreal forest wildfire emissions using airborne observations**

**Katherine L. Hayden et al.**

*Correspondence to:* Katherine L. Hayden ([katherine.hayden@ec.gc.ca](mailto:katherine.hayden@ec.gc.ca))

- [acp-22-12493-2022-supplement-title-page.pdf](#)
- [Supplement.docx](#)

The copyright of individual parts of the supplement might differ from the article licence.
